# Supplementary material for: Risk factors for poor bone health in primary mitochondrial disease
Source: Springer Nature journal article supplement (doi:10.1007/s10545-017-0046-2), 2017-04-27
Supplement: MOESM3 [file 12252614]

**Supplemental Table 2: Nutritional Considerations & Immobility**

| **Vitamin D supplements (excluding MVI, enteral feeds, TPN)**  Currently Taking  Taken in the past and discontinued  Not noted to be taken | 23% (18)  8.8% (7)  69% (55) |
| --- | --- |
| **Calcium Supplements (excluding MVI, enteral feeds, TPN)**  Currently Taking  Taken in the past and discontinued  Not noted to be taken | 7.5% (6)  3.8% (3)  89% (71) |
| **Physical Therapy**  Currently Receiving  Received in the past and discontinued  Not noted to have received | 26% (21)  25% (20)  49% (39) |
| **Occupational Therapy**  Currently Receiving  Received in the past and discontinued  Not noted to have received | 20% (16)  23% (19)  56% (45) |
