# Supplementary material for: Risk factors for poor bone health in primary mitochondrial disease
Source: Springer Nature journal article supplement (doi:10.1007/s10545-017-0046-2), 2017-04-27
Supplement: MOESM5 [file 12252614]

**Supplemental Table 4: Risk factors in subpopulation with any *POLG* mutation (n=5).** The number of patients in each category is shown.

| **Patients with 3 risk factors:**  **Patients with 4 risk factors:**  **Patients with 5 risk factors:** | 1  3  1 |
| --- | --- |
| **High-risk medical conditions (aside from primary mitochondrial disease)** | |
| Liver Disease | 2 |
| Renal Disease | 2 |
| Thyroid Disease | 1 |
| Adrenal Disease | 1 |
| **Current or previous exposure to high-risk medications** | |
| Anticonvulsants | 4 |
| Systemic Glucocorticoid | 1 |
| **Nutritional Factors** | |
| BMI below third percentile | 1 |
| Use of G/J tube | 5 |
| Home TPN | 1 |
| Lactose intolerance | 2 |
